# Supplementary material for: A novel asymmetric di-Ni(ii) system as a highly efficient functional model for phosphodiesterase: synthesis, structures, physicochemical properties and catalytic kinetics
Source: Royal Society of Chemistry journal article supplement (doi:10.1039/c0dt01194k), 2010-12-22
Supplement: c0dt01194k.pdf [file c0dt01194k.pdf]

## Supplementary information

A novel asymmetric di-Ni(II) system as highly efficient functional model for phosphodiesterase: Synthesis, structures, physicochemical properties and catalytic kinetics

Yan-wei Ren<sup>1</sup>, Jia-xian Lu<sup>1</sup>, Bo-wei Cai<sup>1</sup>, Da-bin Shi<sup>1</sup>, Huan-feng Jiang<sup>\*1</sup>, Jun Chen<sup>2</sup>, De Zheng<sup>2</sup>, and Bin Liu<sup>3</sup>

**Table S1.** Crystal data and structure refinement for complexes **2** and **3**

| Complexes                                           | <b>2</b>                                                                           | <b>3</b>                                                                                        |
|-----------------------------------------------------|------------------------------------------------------------------------------------|-------------------------------------------------------------------------------------------------|
| Empirical formula                                   | C <sub>62</sub> H <sub>64</sub> BBrN <sub>10</sub> Ni <sub>2</sub> O <sub>13</sub> | C <sub>72</sub> H <sub>78</sub> BBrN <sub>6</sub> Ni <sub>2</sub> O <sub>9</sub> P <sub>2</sub> |
| Formula weight                                      | 1365.32                                                                            | 1441.43                                                                                         |
| Crystal size (mm)                                   | 0.30 × 0.20 × 0.20                                                                 | 0.30 × 0.20 × 0.10                                                                              |
| T(K)                                                | 293                                                                                | 293                                                                                             |
| Wavelength (Å)                                      | 0.71073                                                                            | 0.71073                                                                                         |
| Crystal system                                      | Monoclinic                                                                         | Triclinic                                                                                       |
| Space group                                         | <i>P2<sub>1</sub>/c</i>                                                            | <i>P</i> -1                                                                                     |
| <i>a</i> (Å)                                        | 13.222(3)                                                                          | 14.913(3)                                                                                       |
| <i>b</i> (Å)                                        | 25.914(5)                                                                          | 15.245(3)                                                                                       |
| <i>c</i> (Å)                                        | 19.506(4)                                                                          | 15.720(3)                                                                                       |
| $\alpha$ (°)                                        | 90                                                                                 | 93.31(3)                                                                                        |
| $\beta$ (°)                                         | 107.11(3)                                                                          | 99.98(3)                                                                                        |
| $\gamma$ (°)                                        | 90                                                                                 | 90.46(3)                                                                                        |
| <i>V</i> (Å <sup>3</sup> )                          | 6387(2)                                                                            | 3513.5(12)                                                                                      |
| <i>Z</i>                                            | 4                                                                                  | 2                                                                                               |
| Density (g·cm <sup>-1</sup> )                       | 1.414                                                                              | 1.356                                                                                           |
| <i>F</i> (000)                                      | 2800                                                                               | 1486                                                                                            |
| Absorption coefficient (mm <sup>-1</sup> )          | 1.285                                                                              | 1.210                                                                                           |
| Data / restraints / parameters                      | 11227 / 6 / 803                                                                    | 12269 / 174 / 737                                                                               |
| $\theta$ range for data collection (°)              | 3.07 to 25.00                                                                      | 3.01 to 25.00                                                                                   |
| Reflections collected                               | 48779                                                                              | 27514                                                                                           |
| Independent reflections                             | 11227 ( <i>R</i> <sub>int</sub> = 0.0837)                                          | 12269 ( <i>R</i> <sub>int</sub> = 0.1194)                                                       |
| GOF on <i>F</i> <sup>2</sup>                        | 1.013                                                                              | 1.054                                                                                           |
| Final <i>R</i> indices [ <i>I</i> > 2σ( <i>I</i> )] | <i>R</i> <sub>1</sub> = 0.0650<br><i>wR</i> <sub>2</sub> = 0.1705                  | <i>R</i> <sub>1</sub> = 0.0942<br><i>wR</i> <sub>2</sub> = 0.2153                               |
| <i>R</i> indices (all data)                         | <i>R</i> <sub>1</sub> = 0.1333<br><i>wR</i> <sub>2</sub> = 0.2095                  | <i>R</i> <sub>1</sub> = 0.2450<br><i>wR</i> <sub>2</sub> = 0.2942                               |

**Table S2.** Selected Bond Lengths (Å) and Angles (deg) for complexes **2** and **3**

| <b>2</b>          |            | <b>3</b>         |           |
|-------------------|------------|------------------|-----------|
| Bond lengths (Å)  |            |                  |           |
| Ni (1)-O(1)       | 1.993(4)   | Ni(1)-O(1)       | 2.073(10) |
| Ni (1)-O(3)       | 2.016(4)   | Ni (1)-O(2)      | 2.036(10) |
| Ni(1)-O(5)        | 2.094(4)   | Ni (1)-O(6)      | 2.069(11) |
| Ni (1)-N(3)       | 2.088(5)   | Ni (1)-N(1)      | 2.080(13) |
| Ni (1)-N(4)       | 2.152(6)   | Ni (1)-N(2)      | 2.117(13) |
| Ni (1)-N(6)       | 2.155(7)   | Ni (1)-N(5)      | 2.144(15) |
| Ni(2)-O(1)        | 1.995(4)   | Ni (2)-O(1)      | 2.010(11) |
| Ni (2)-O(2)       | 2.082(4)   | Ni(2)-O(3)       | 2.015(10) |
| Ni (2)-O(4)       | 2.020(4)   | Ni (2)-O(7)      | 2.067(11) |
| Ni (2)-N(1)       | 2.085(5)   | Ni (2)-N(3)      | 2.072(12) |
| Ni (2)-N(2)       | 2.112(5)   | Ni (2)-N(4)      | 2.069(14) |
| Ni (2)-N(5)       | 2.088(6)   | Ni (2)-N(6)      | 2.115(18) |
| Ni (1)··· Ni (2)  | 3.445      | Ni (1)··· Ni (2) | 3.639     |
| Bond angles (deg) |            |                  |           |
| O(1)-Ni(1)-O(3)   | 96.21(16)  | O(2)-Ni(1)-O(1)  | 91.5(4)   |
| O(1)-Ni(1)-N(3)   | 91.33(18)  | O(1)-Ni(1)-N(1)  | 92.4(5)   |
| N(3)-Ni(1)-N(4)   | 74.8(2)    | N(1)-Ni(1)-N(2)  | 75.6(6)   |
| O(3)-Ni(1)-N(4)   | 97.7(2)    | O(6)-Ni(1)-N(2)  | 97.0(5)   |
| O(5)-Ni(1)-N(6)   | 168.0(2)   | O(2)-Ni(1)-N(5)  | 172.9(5)  |
| O(1)-Ni(2)-O(4)   | 95.52(16)  | O(1)-Ni(2)-O(3)  | 94.0(4)   |
| O(1)-Ni(2)-N(1)   | 89.92(16)  | O(1)-Ni(2)-N(3)  | 93.3(5)   |
| N(1)-Ni(2)-N(2)   | 81.94(18)  | N(3)-Ni(2)-N(4)  | 82.5(5)   |
| O(4)-Ni(2)-N(2)   | 92.74(17)  | O(3)-Ni(2)-N(4)  | 90.4(5)   |
| O(2)-Ni(2)-N(5)   | 172.64(18) | O(7)-Ni(2)-N(6)  | 177.0(6)  |
| Ni(1)-O(1)-Ni(2)  | 119.46     | Ni(1)-O(1)-Ni(2) | 126.09    |

Acquisition Parameter

|                   |                |              |            |                          |          |
|-------------------|----------------|--------------|------------|--------------------------|----------|
| Ion Source Type   | ESI            | Ion Polarity | Positive   | Alternating Ion Polarity | on       |
| Mass Range Mode   | Ultra Scan     | Scan Begin   | 300 m/z    | Scan End                 | 1500 m/z |
| Capillary Exit    | -156.6 Volt    | Skim 1       | -40.0 Volt | Trap Drive               | 91.3     |
| Accumulation Time | 200000 $\mu$ s | Averages     | 5 Spectra  | Auto MS/MS               | off      |

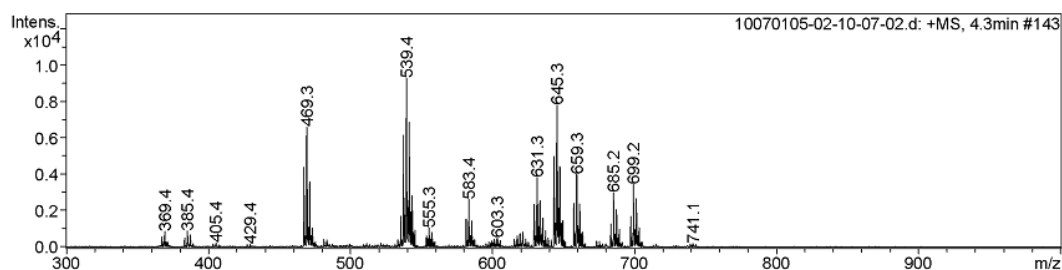

| #  | m/z   | I    | I%    |
|----|-------|------|-------|
| 1  | 467.4 | 4374 | 47.1  |
| 2  | 469.3 | 6584 | 71.0  |
| 3  | 537.4 | 6141 | 66.2  |
| 4  | 539.4 | 9278 | 100.0 |
| 5  | 541.4 | 6849 | 73.8  |
| 6  | 631.3 | 3816 | 41.1  |
| 7  | 643.3 | 4965 | 53.5  |
| 8  | 645.3 | 7809 | 84.2  |
| 9  | 647.3 | 4414 | 47.6  |
| 10 | 659.3 | 3995 | 43.1  |

Figure S3. ESI-MS spectrum of complex 1. Solvent: water/ethanol (1/1, v/v)

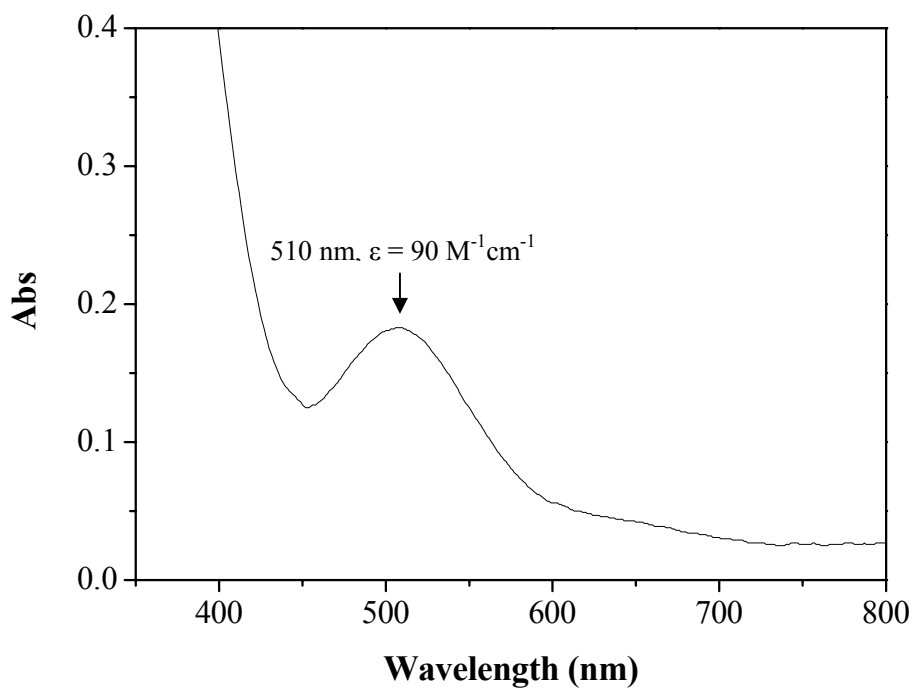

Figure S4 UV-vis spectrum of complex 1. Solvent: water/ethanol (1/1, v/v)

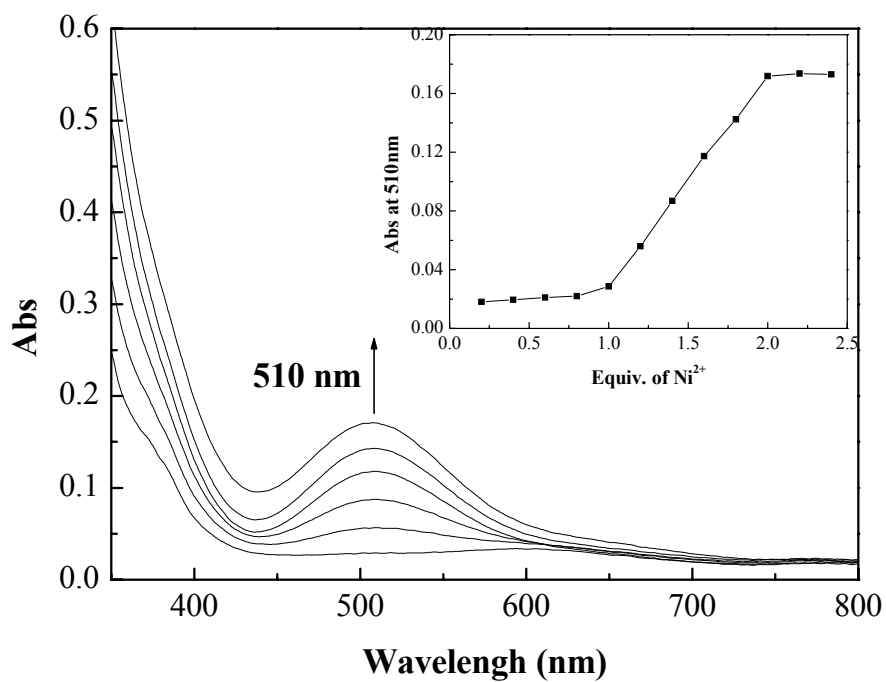

**Figure S5.** UV-vis spectra recorded upon titration of Ni<sup>2+</sup> to **HL** in buffer solution (50 mM HEPPS and 100 mM NaClO<sub>4</sub> in water/ethanol (1/1, v/v), pH = 8.3), Inset: absorbance at 510 nm vs. equivalent of Ni<sup>2+</sup> added.
